# Supplementary material for: Catalytic degradation of pine sawdust over heterotopic Ca–Fe and HZSM-5 to produce aromatic hydrocarbons
Source: Royal Society of Chemistry journal article supplement (doi:10.1039/d3re00572k), 2024-01-01
Supplement: d3re00572k1.pdf [file d3re00572k1.pdf]

## Catalytic degradation of pine sawdust over heterotopic Ca-Fe and HZSM-5 to produce aromatic hydrocarbons

Huifen Kang<sup>a</sup>, Xintong Guo<sup>a, c</sup>, Mei An<sup>a</sup>, Conghua Ma<sup>a</sup>, Guozhang Chang<sup>a, d, \*</sup>, Qingjie Guo<sup>a, b, \*</sup>, Jingjing Ma<sup>a, \*</sup>

*<sup>a</sup> State Key Laboratory of High-efficiency Utilization of Coal and Green Chemical Engineering, Ningxia University, Yinchuan, 750021, China*

*<sup>b</sup> College of Chemical Engineering, Qingdao University of Science & Technology, Qingdao 266042, China*

*<sup>c</sup> Technology Innovation Centre of Modern Chemical Engineering, Institute of Industrial Engineering, Ningxia Polytechnic, Yinchuan 750021, China*

*<sup>d</sup> Institute of Yellow River Delta Earth Surface Process and Ecological Integrity, Shandong University of Science and Technology, Qingdao 266590, China*

---

\*Corresponding author.

E-mail address: qingjie\_guo@vip.sina.com. changguozhang@163.com. mjj\_1022@163.com.

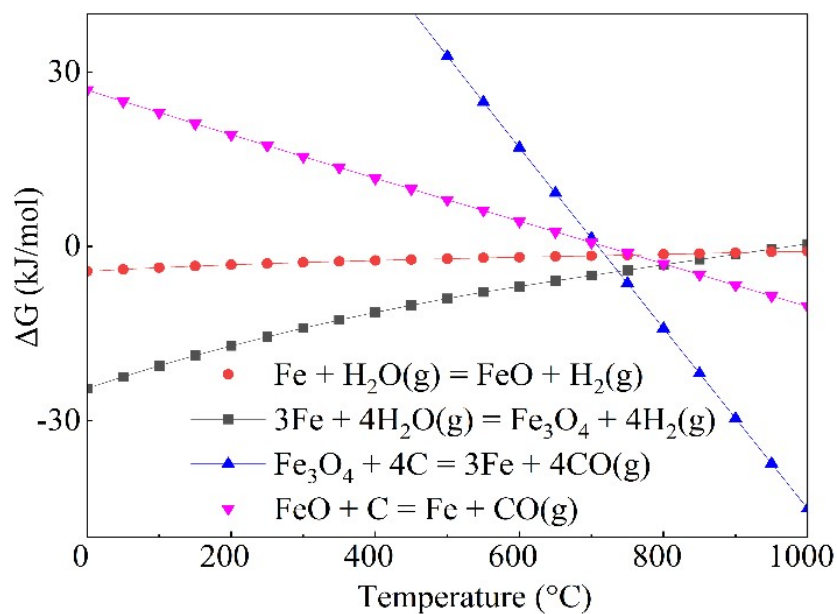

**Fig. S1** Gibbs free energies for the reactions of iron catalyst with water and carbon at different temperatures.

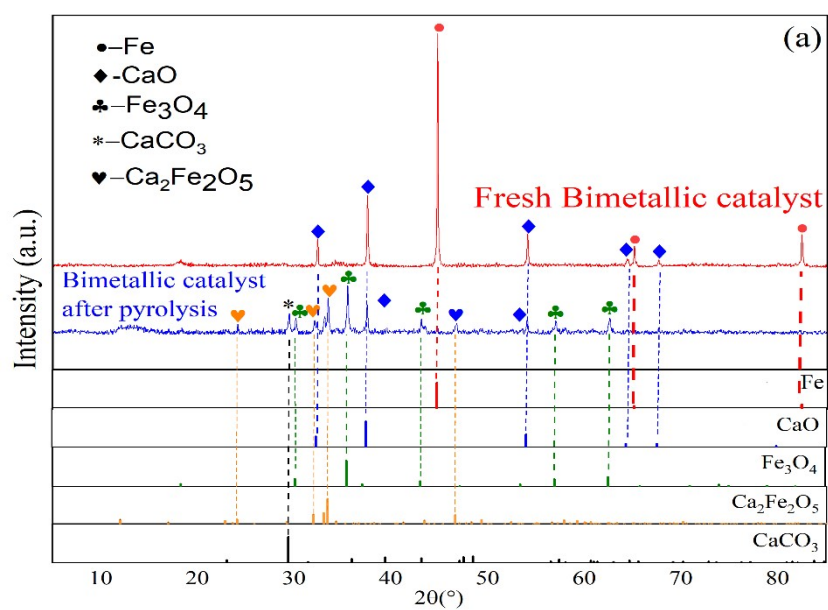

**Fig. S2** XRD patterns of bimetallic catalysts before and after pyrolysis.

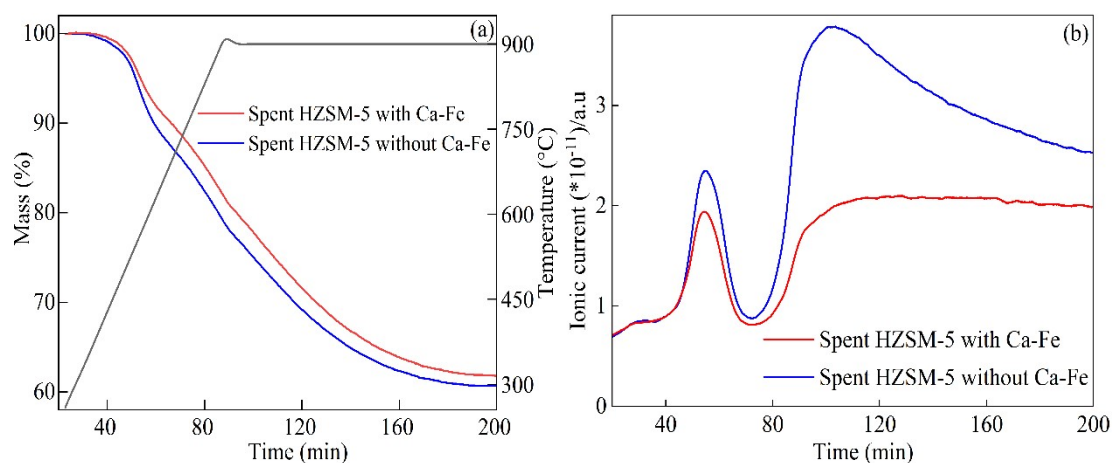

**Fig. S3** (a) TG curves and (b) ionic current intensity of CO<sub>2</sub> for HZSM-5 after pyrolysis.

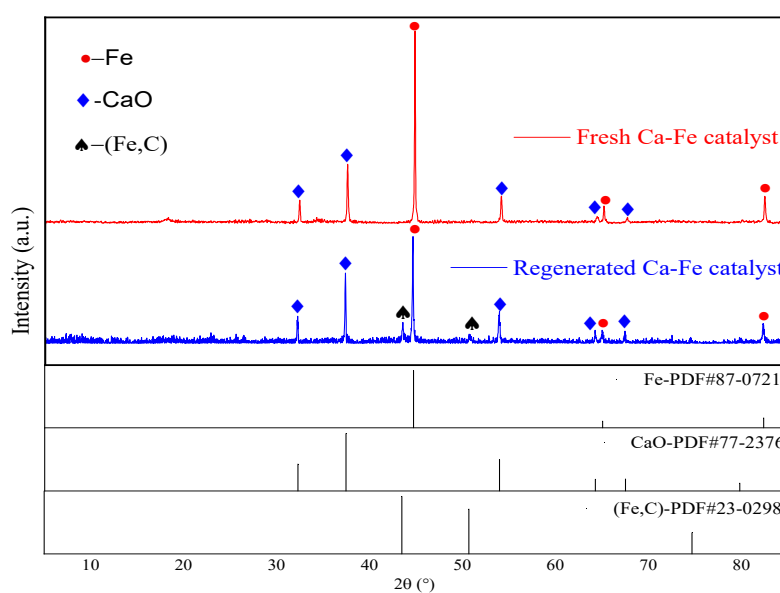

**Fig. S4** XRD patterns of fresh Ca-Fe catalyst and regenerated Ca-Fe catalyst.

**Table S1** The detailed reaction conditions

| No. | Ca-Fe to HZSM-5 ratio | Temperature (°C) | Catalysts to pine sawdust ratio |
|-----|-----------------------|------------------|---------------------------------|
| 1   | 0:1                   | 600              | 2:1                             |
| 2   | 1:2                   | 600              | 2:1                             |
| 3   | 1:1                   | 600              | 2:1                             |
| 4   | 2:1                   | 600              | 2:1                             |
| 5   | 1:0                   | 600              | 2:1                             |

|    |     |     |     |
|----|-----|-----|-----|
| 6  | 1:1 | 450 | 2:1 |
| 7  | 1:1 | 500 | 2:1 |
| 8  | 1:1 | 550 | 2:1 |
| 9  | 1:1 | 600 | 2:1 |
| 10 | 1:1 | 650 | 2:1 |
| 11 | 1:1 | 600 | 0:1 |
| 12 | 1:1 | 600 | 1:1 |
| 13 | 1:1 | 600 | 2:1 |
| 14 | 1:1 | 600 | 3:1 |

**Table S2** Calibration equations and correlation coefficients for the aromatic products

| Aromatics    | Calibration equations             | Correlation coefficients, R <sup>2</sup> |
|--------------|-----------------------------------|------------------------------------------|
| benzene      | $y = 614242.6482x - 219673.7989$  | 0.997                                    |
| toluene      | $y = 953897.9604x - 405341.7278$  | 0.998                                    |
| ethylbenzene | $y = 1092883.5058x + 82135.1803$  | 0.999                                    |
| m-xylene     | $y = 2279600.7678x - 166073.3567$ | 0.999                                    |
| o-xylene     | $y = 1248772.704x + 1337487.0079$ | 0.999                                    |

**Table S3** Concentration of gaseous products in the overall reactor effluent from catalytic pyrolysis of pine sawdust (%)

| Reaction conditions            | H <sub>2</sub> | CO <sub>2</sub> | CH <sub>4</sub> | CO     |        |
|--------------------------------|----------------|-----------------|-----------------|--------|--------|
| Ca-Fe/<br>HZSM-5<br>mass ratio | 0:00           | 0.7484          | 1.1777          | 0.1838 | 1.2265 |
|                                | 1:00           | 2.2000          | 0.1922          | 0.2061 | 1.0900 |
|                                | 1:02           | 1.8899          | 0.7921          | 0.2438 | 1.4327 |

|                                 |      |        |        |        |        |
|---------------------------------|------|--------|--------|--------|--------|
|                                 | 1:01 | 2.3567 | 0.2815 | 0.2358 | 1.4029 |
|                                 | 2:01 | 2.8199 | 0.1391 | 0.1971 | 1.2645 |
|                                 | 0:01 | 0.8434 | 1.3143 | 0.2050 | 1.3922 |
| Temperature                     | 450  | 0.9391 | 1.3069 | 0.1110 | 0.8178 |
|                                 | 500  | 1.4427 | 1.0462 | 0.1532 | 1.0675 |
|                                 | 550  | 2.0170 | 0.6324 | 0.2001 | 1.4087 |
|                                 | 600  | 2.3567 | 0.2815 | 0.2358 | 1.4029 |
|                                 | 650  | 2.0859 | 0.4857 | 0.2388 | 1.5210 |
| Catalysts/pine<br>sawdust ratio | 0:01 | 0.7484 | 1.1777 | 0.1838 | 1.2265 |
|                                 | 1:01 | 1.8391 | 0.6780 | 0.2290 | 1.4281 |
|                                 | 2:01 | 2.3567 | 0.2815 | 0.2358 | 1.4029 |
|                                 | 3:01 | 2.6533 | 0.0835 | 0.2348 | 1.3547 |

**Table S4** Compositions of bio-oil from pine sawdust pyrolysis at different conditions (peak area percentage/%).

| Compound                                      | Ca-Fe to HZSM-5 ratio |       |       |       |       | Temperature |       |       |       | Catalysts to biomass ratio |       |       |
|-----------------------------------------------|-----------------------|-------|-------|-------|-------|-------------|-------|-------|-------|----------------------------|-------|-------|
|                                               | 1:0                   | 1:2   | 1:1   | 2:1   | 0:1   | 450         | 500   | 550   | 650   | 0:1                        | 1:1   | 3:1   |
| <b>Mono-aromatic hydrocarbons (MAHs)</b>      |                       |       |       |       |       |             |       |       |       |                            |       |       |
| Benzene                                       | 3.06                  | 7.99  | 9.37  | 8.50  | 7.61  | 5.98        | 6.31  | 8.02  | 12.66 | 0.78                       | 12.97 | 11.97 |
| Toluene                                       | 3.06                  | 20.02 | 21.45 | 18.32 | 16.79 | 13.86       | 15.69 | 18.77 | 23.19 | 0.91                       | 15.83 | 23.81 |
| Ethylbenzene                                  | 0.27                  | 1.50  | 1.74  | 1.31  | 1.15  | 1.30        | 1.30  | 1.20  | 0.85  | 0                          | 1.32  | 1.02  |
| Benzene, 1,3-dimethyl-                        | 0.75                  | 10.77 | 10.65 | 10.19 | 9.04  | 7.92        | 8.97  | 10.11 | 7.18  | 0.20                       | 4.85  | 8.94  |
| Styrene                                       | 0.38                  | 0     | 0.54  | 1.43  | 0.43  | 0           | 0.72  | 0.28  | 0.66  | 0                          | 0.46  | 0.62  |
| O-xylene                                      | 0.29                  | 2.26  | 2.08  | 2.01  | 1.66  | 1.18        | 1.21  | 1.63  | 1.46  | 0                          | 1.29  | 2.10  |
| Benzene, 1-ethyl-4-methyl-                    | 0                     | 0     | 1.04  | 0.95  | 0.49  | 1.46        | 1.27  | 1.27  | 0.74  | 0                          | 1.36  | 0.79  |
| Mesitylene                                    | 0                     | 0.31  | 1.54  | 0.76  | 0.29  | 1.61        | 1.34  | 1.42  | 0.62  | 0                          | 0.94  | 0.65  |
| Benzene, 1-propynyl-                          | 0                     | 0     | 1.14  | 0.94  | 0.33  | 0           | 0.56  | 0.69  | 0.82  | 0                          | 0.36  | 1.04  |
| Benzene, 1,3,5-trimethyl-2-(1,2-propadienyl)- | 0                     | 0.27  | 1.38  | 1.16  | 0.28  | 0           | 0.96  | 0.39  | 0.34  | 0                          | 0.64  | 0.62  |
| <b>Poly-aromatic hydrocarbons (PAHs)</b>      |                       |       |       |       |       |             |       |       |       |                            |       |       |
| Indane                                        | 0                     | 1.65  | 1.34  | 0.73  | 0     | 1.44        | 1.51  | 1.36  | 1.48  | 0                          | 0.96  | 1.54  |

|                                                                 |      |      |      |      |      |      |      |      |      |      |      |      |
|-----------------------------------------------------------------|------|------|------|------|------|------|------|------|------|------|------|------|
| Naphthalene, 1,2-dihydro-                                       | 0    | 2.85 | 2.49 | 2.51 | 2.97 | 3.15 | 3.1  | 2.47 | 2.62 | 0    | 2.24 | 2.65 |
| Naphthalene                                                     | 0    | 2.38 | 1.98 | 0.83 | 2.84 | 2.66 | 2.65 | 2.2  | 2.4  | 0    | 1.5  | 2.24 |
| Naphthalene, 2-methyl-                                          | 0    | 4.63 | 4.89 | 5.03 | 4.83 | 5.49 | 5.67 | 5.02 | 4.93 | 0    | 2.84 | 5.02 |
| Naphthalene, 2-ethyl-                                           | 0    | 1.62 | 1.82 | 0.93 | 1.77 | 2.02 | 1.88 | 1.88 | 1.92 | 0    | 1.68 | 1.82 |
| Naphthalene, 2,6-dimethyl-                                      | 0    | 3.77 | 4.23 | 3.74 | 3.81 | 4.66 | 4.55 | 4.31 | 4.63 | 0    | 3.34 | 4.43 |
| Naphthalene, 2-ethenyl-                                         | 0    | 1.55 | 1.26 | 1.62 | 1.57 | 1.48 | 1.42 | 1.38 | 1.64 | 0    | 0.92 | 1.48 |
| 1-Naphthalenol, 5,8-dihydro-                                    | 0    | 1.46 | 1.19 | 1.12 | 1.65 | 1.41 | 1.08 | 1.16 | 1.25 | 0    | 0.68 | 1.32 |
| Naphthalene, 1-propyl-                                          | 0    | 1.23 | 0.92 | 1.25 | 1.28 | 0    | 0.98 | 0.90 | 0.93 | 0    | 0    | 1.05 |
| Naphthalene, 1,6,7-trimethyl-                                   | 0    | 1.63 | 1.64 | 1.24 | 1.65 | 1.87 | 1.77 | 1.68 | 1.88 | 0    | 0.98 | 1.66 |
| Fluorene                                                        | 0    | 1.43 | 1.57 | 1.62 | 1.43 | 1.42 | 1.02 | 0.94 | 1.95 | 0    | 1.5  | 1.68 |
| Naphthalene, 2-methyl-1-propyl-                                 | 0    | 0.98 | 0.94 | 1.34 | 1.87 | 1.34 | 1.28 | 1.22 | 1.58 | 0    | 0.68 | 1.06 |
| 9H-Fluorene, 9-methyl-                                          | 0    | 1.76 | 1.32 | 1.69 | 1.65 | 1.64 | 1.36 | 1.38 | 1.38 | 0    | 1.45 | 1.52 |
| Phenanthrene                                                    | 0    | 1.21 | 1.46 | 1.94 | 1.45 | 1.68 | 1.53 | 1.50 | 1.06 | 0    | 1.02 | 1.82 |
| Anthracene                                                      | 0    | 3.24 | 3.31 | 3.93 | 3.82 | 3.52 | 3.42 | 3.36 | 3.62 | 0    | 3.28 | 3.52 |
| 9H-Fluorene, 9,9-dimethyl-                                      | 0    | 1.42 | 0.92 | 0    | 1.35 | 0    | 0    | 0.88 | 0.98 | 0    | 1.06 | 1.25 |
| Anthracene, 2-methyl-                                           | 0    | 0.97 | 1.27 | 1.28 | 1.26 | 1.76 | 1.54 | 1.31 | 1.28 | 0    | 1.36 | 1.09 |
| Phenanthrene, 2-methyl-                                         | 0    | 2.48 | 2.63 | 2.53 | 2.61 | 2.84 | 2.8  | 2.82 | 2.31 | 0    | 2.08 | 2.78 |
| Phenanthrene, 1,7-dimethyl-                                     | 0    | 1.66 | 1.63 | 1.82 | 1.89 | 1.74 | 1.68 | 1.66 | 1.68 | 0    | 1.66 | 2.06 |
| Phenanthrene, 2,3-dimethyl-                                     | 0    | 1.22 | 0.94 | 1.26 | 1.26 | 0    | 0    | 0.69 | 0.92 | 0    | 0.84 | 1.05 |
| Anthracene, 1,4-dimethyl-                                       | 0    | 1.44 | 1.78 | 1.51 | 1.68 | 2.00 | 2.02 | 1.94 | 1.82 | 0    | 1.69 | 1.92 |
| <b>Methoxyphenols (MPHs)</b>                                    |      |      |      |      |      |      |      |      |      |      |      |      |
| Phenol, 2-methoxy-                                              | 1.42 | 0.51 | 0.50 | 0.57 | 0.64 | 0.94 | 0.78 | 0.67 | 0.53 | 4.22 | 0.86 | 0.24 |
| 2-Methoxy-5-methylphenol                                        | 3.20 | 1.54 | 0.80 | 1.29 | 1.86 | 3.30 | 2.92 | 1.92 | 0.77 | 9.24 | 2.24 | 0.32 |
| Phenol, 4-ethyl-2-methoxy-                                      | 1.04 | 0.74 | 0.32 | 0.88 | 0.83 | 0.38 | 0.38 | 0.35 | 0    | 2.44 | 0.70 | 0    |
| Phenol, 2,6-dimethoxy-                                          | 0.92 | 0.13 | 0    | 0.42 | 0.54 | 0.66 | 0.52 | 0    | 0    | 3.03 | 0.64 | 0    |
| Phenol, 2-methoxy-4-propyl-                                     | 2.06 | 1.19 | 0.39 | 0.82 | 1.27 | 2.14 | 2.24 | 1.88 | 0.64 | 7.42 | 1.62 | 0.12 |
| <b>Phenols (PHs)</b>                                            |      |      |      |      |      |      |      |      |      |      |      |      |
| Phenol                                                          | 9.45 | 2.36 | 0.66 | 1.59 | 1.25 | 0.10 | 0.62 | 0.62 | 0.86 | 1.56 | 0.94 | 0.62 |
| Phenol, 2-methyl-                                               | 7.06 | 0.92 | 0.42 | 0.76 | 1.59 | 0    | 0    | 0.15 | 0.22 | 4.56 | 2.32 | 0.54 |
| p-Cresol                                                        | 6.36 | 1.17 | 0.29 | 1.02 | 0.93 | 0    | 0.26 | 0.29 | 0.32 | 3.11 | 1.68 | 0.22 |
| Phenol, 2,4-dimethyl-                                           | 1.84 | 0    | 0    | 0    | 0    | 0    | 0    | 0    | 0    | 0.64 | 0.43 | 0    |
| Catechol                                                        | 1.28 | 0.27 | 0.32 | 0.82 | 0.84 | 0.12 | 0.24 | 0.28 | 0.32 | 2.36 | 1.02 | 0.20 |
| Phenol, 3,4-dimethyl-                                           | 0.25 | 0    | 0    | 0    | 0    | 0    | 0    | 0    | 0    | 0    | 0    | 0    |
| Phenol, 3-ethyl-                                                | 1.26 | 0    | 0    | 0    | 0    | 0    | 0    | 0    | 0    | 0    | 0    | 0    |
| 1,2-Benzenediol, 3-methyl-                                      | 5.20 | 0.82 | 0.25 | 0.65 | 1.21 | 0.13 | 0.22 | 0.24 | 0.64 | 4.04 | 2.81 | 0.34 |
| 1,3-Benzenediol, 4,5-dimethyl-                                  | 3.26 | 0.30 | 0    | 0.13 | 1.62 | 0.14 | 0.28 | 0.22 | 0    | 2.24 | 1.46 | 0    |
| <b>Other oxygenates (Acids, Ketones, Furans, Anhydrosugars)</b> |      |      |      |      |      |      |      |      |      |      |      |      |
| Acetic acid                                                     | 0    | 0    | 0    | 0    | 0.26 | 0.82 | 0.38 | 0    | 0    | 8.86 | 0    | 0    |
| Homovanillic acid                                               | 0    | 0    | 0    | 0    | 0    | 0.28 | 0    | 0    | 0    | 2.42 | 0    | 0    |
| 2-Propanone, 1-hydroxy-                                         | 5.36 | 0.48 | 0.39 | 0.55 | 0.29 | 0.84 | 0.84 | 0.42 | 0.28 | 4.62 | 1.34 | 0    |
| 1-Hydroxy-2-butanone                                            | 5.33 | 0    | 0    | 0    | 0    | 1.13 | 0.46 | 0    | 0    | 4.67 | 0.54 | 0    |
| 2(5H)-Furanone                                                  | 1.96 | 0    | 0    | 0    | 0.44 | 0.21 | 0    | 0    | 0    | 0    | 0.56 | 0    |
| 1,2-Cyclopentanedione                                           | 8.28 | 1.32 | 1.18 | 1.17 | 0.61 | 3.42 | 2.72 | 2.44 | 1.09 | 6.96 | 1.62 | 0.53 |
| 2-Cyclopenten-1-one, 3-methyl-                                  | 0.96 | 0    | 0    | 0    | 0.66 | 0.82 | 0.42 | 0    | 0    | 0    | 0    | 0    |
| 3-Penten-2-one                                                  | 4.82 | 0.54 | 0.62 | 0.76 | 0.27 | 0.40 | 0.28 | 0.28 | 0.64 | 4.37 | 1.02 | 0    |
| Ethanone, 1-(2-hydroxy-5-                                       | 9.64 | 1.56 | 0.45 | 1.80 | 1.07 | 3.24 | 2.73 | 2.62 | 0.48 | 9.37 | 3.28 | 0.34 |

|                                            |      |      |      |      |      |      |      |      |      |      |      |      |
|--------------------------------------------|------|------|------|------|------|------|------|------|------|------|------|------|
| methylphenyl)-                             |      |      |      |      |      |      |      |      |      |      |      |      |
| .beta.-D-Glucopyranose, 1,6-anhydro-       | 0    | 0    | 0    | 0    | 0    | 0.62 | 0    | 0    | 0    | 2.74 | 0    | 0    |
| Furfural                                   | 0.59 | 0.24 | 0.38 | 0.24 | 0.62 | 0.32 | 0.24 | 0.42 | 0.40 | 0.98 | 0.52 | 0.28 |
| Benzofuran, 2,3-dihydro-                   | 5.26 | 0.38 | 0.41 | 0.65 | 0.36 | 2.55 | 1.98 | 1.52 | 0.45 | 3.52 | 0.51 | 0.33 |
| Benzofuran, 2-methyl-                      | 1.79 | 0.16 | 0.62 | 0.44 | 0.64 | 0.62 | 0.72 | 0.58 | 0.55 | 1.62 | 0.60 | 0.36 |
| Benzofuran, 2,3-dihydro-2-methyl-7-phenyl- | 1.62 | 0    | 0    | 0    | 0.42 | 0    | 0    | 0    | 0    | 1.35 | 0    | 0    |

**Table S5** Specific surface area and pore volume of HZSM-5

| Catalysts                  | $S_{\text{BET}}$ ( $\text{m}^2 \cdot \text{g}^{-1}$ ) | $V$ ( $\text{cm}^3 \cdot \text{g}^{-1}$ ) |
|----------------------------|-------------------------------------------------------|-------------------------------------------|
| Fresh HZSM-5               | 519.773                                               | 0.3598                                    |
| Spent HZSM-5 without Ca-Fe | 318.053                                               | 0.2244                                    |
| Spent HZSM-5 with Ca-Fe    | 397.574                                               | 0.2625                                    |
